# Supplementary material
Source: PubMed Central journal article supplement (PMC8754391)
Supplement: NIHMS1749811-supplement-Supplemental_Figure_1.pdf [file NIHMS1749811-supplement-Supplemental_Figure_1.pdf]

**Western blots**

**a** Fig. 1c

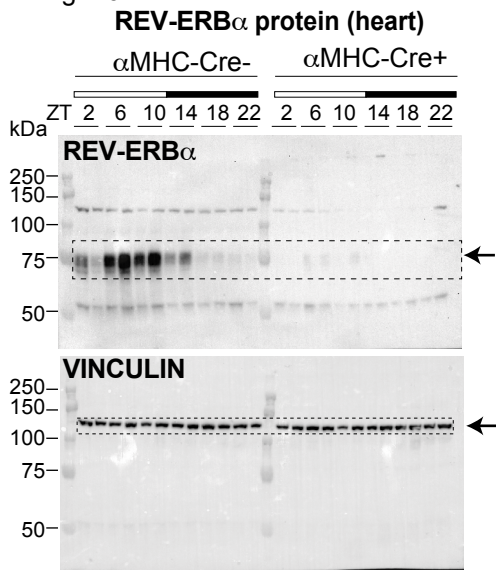

**b** Extended data Fig. 1a

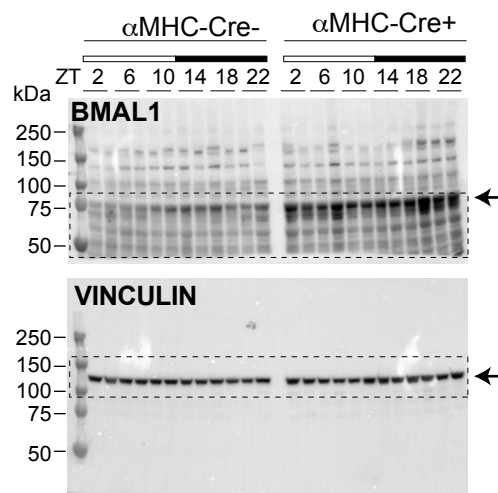

**c** Extended data Fig. 4b

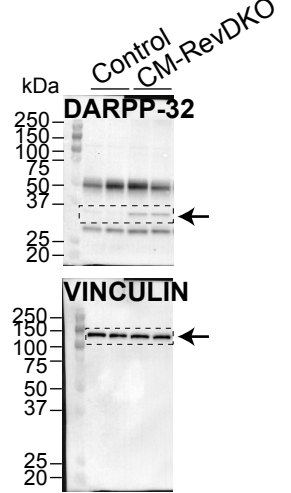

**d** Fig. 3e

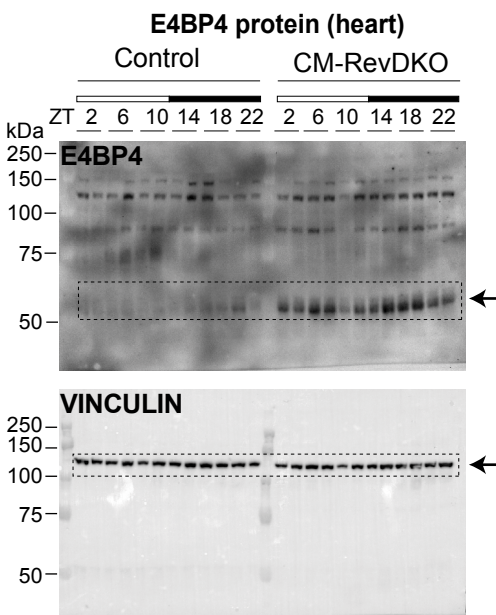

**e** Extended data Fig. 5i

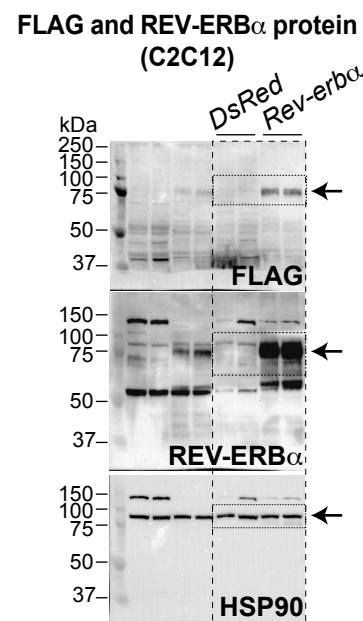

**f** Fig. 5d (longer exposure)

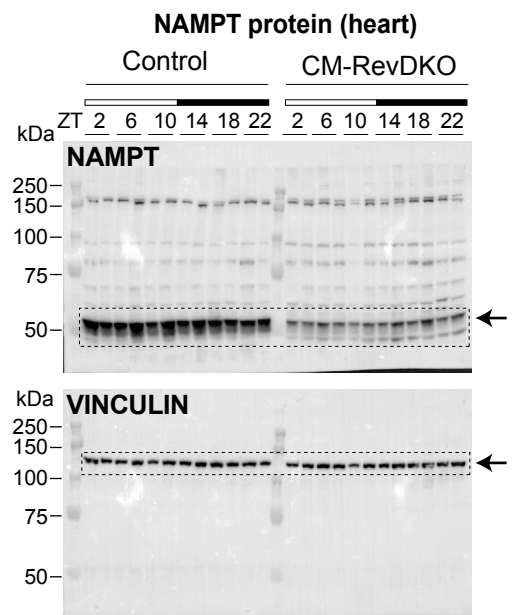

**g** Extended data Fig. 7c

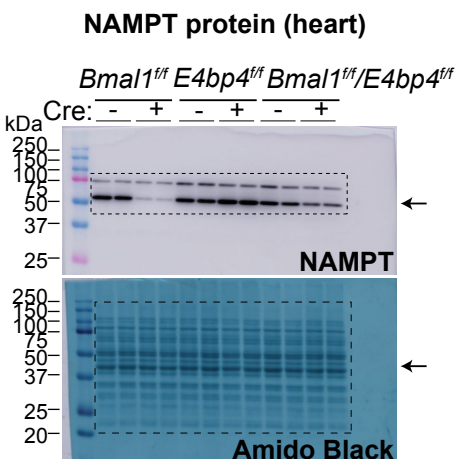

**Supplementary Figure 1. Uncropped scan images of western blot membranes**
